# Supplementary material
Source: MDPI journal article supplement (https://www.mdpi.com/2073-4344/13/3/628)
Supplement: s1 [file s1]

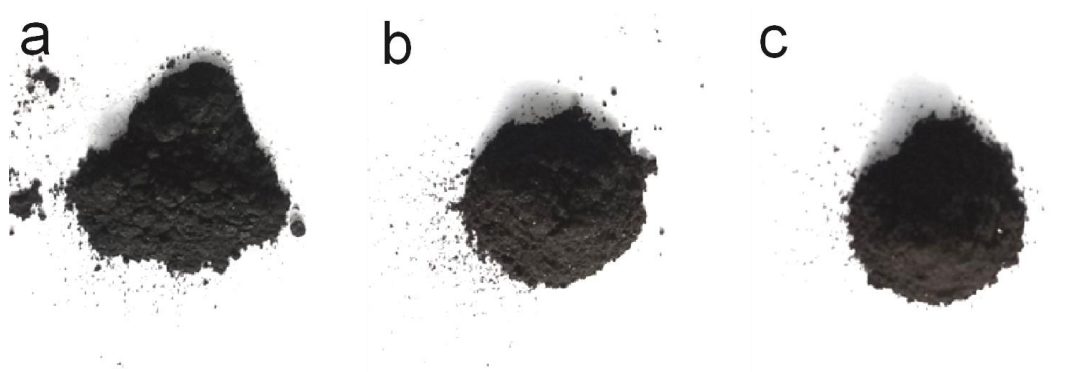

**Figure S1.** Photos of (a) L-coal, (b) H-coal, (c) Y-coal.

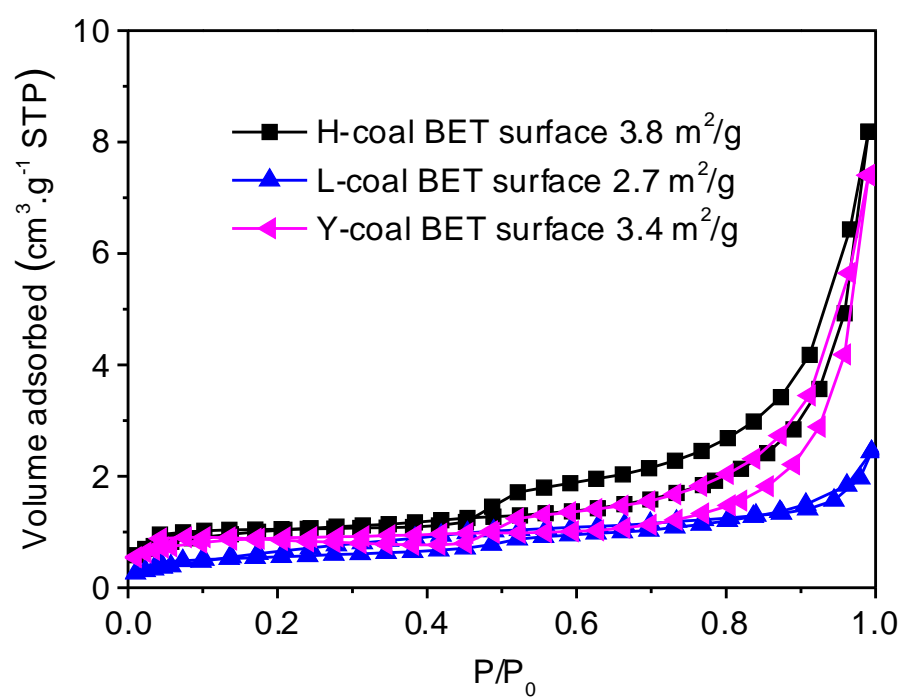

**Figure S2.**  $\text{N}_2$  adsorption–desorption isothermal curve of various coal powders.

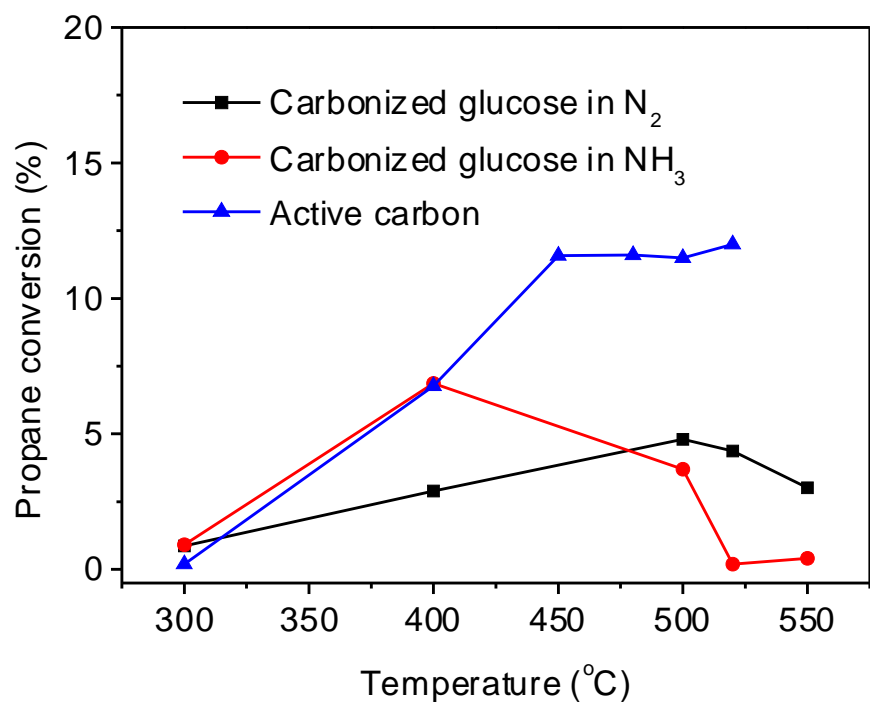

**Figure S3.** Propane conversion of active carbon, glucose carbonized in N<sub>2</sub> or NH<sub>3</sub>.

Reaction conditions: 15 kPa O<sub>2</sub>, 30 kPa C<sub>3</sub>H<sub>8</sub>, N<sub>2</sub> balance, 20 mL·min<sup>-1</sup>.

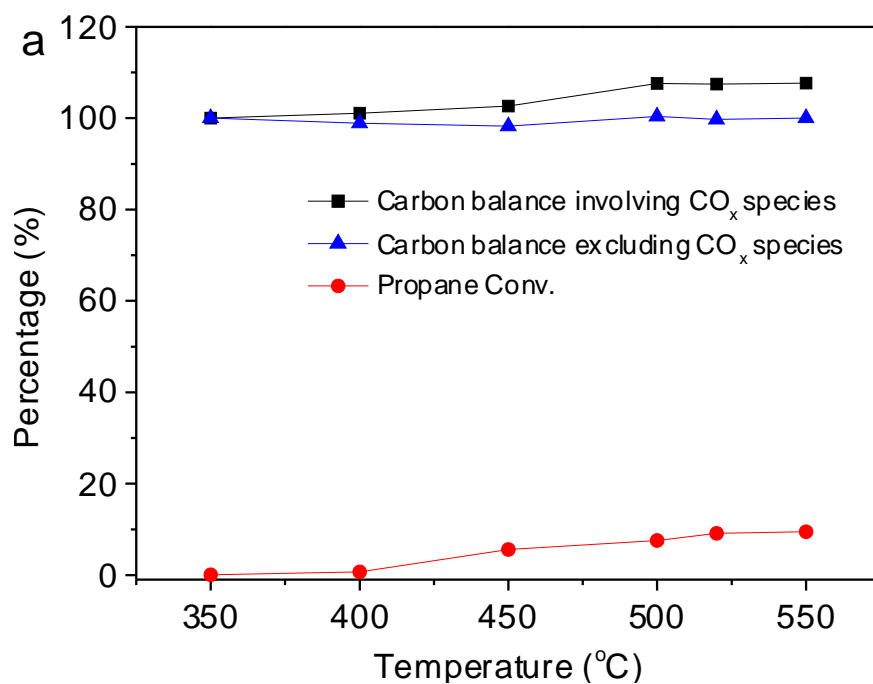

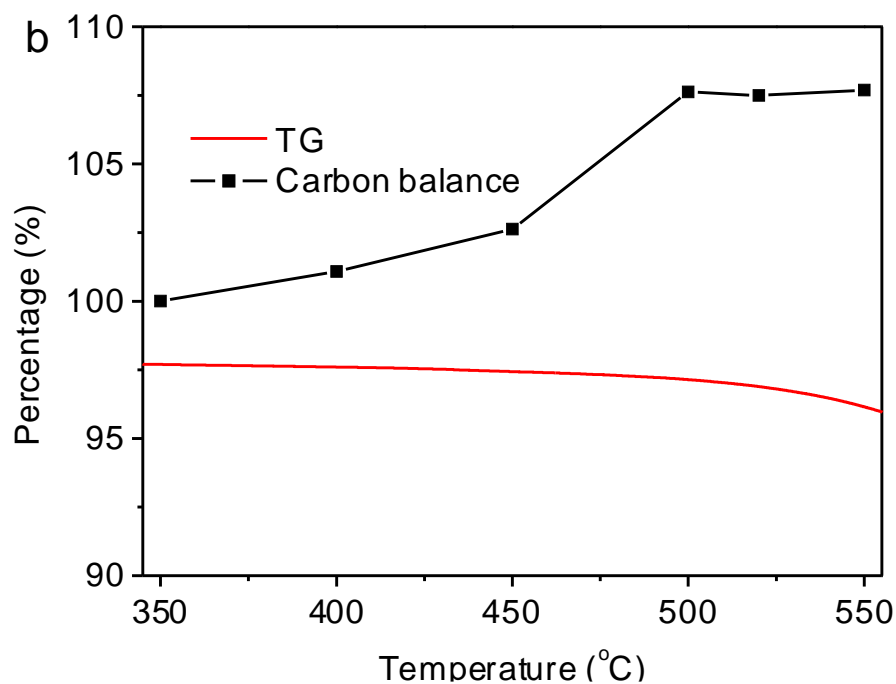

**Figure S4.** (a) The conversion of the oxidative dehydrogenation of propane for L-coal and the carbon balance when excluding and involving  $\text{CO}_x$  in the calculation. (b) Comparison between the carbon balance involving  $\text{CO}_x$  and TG result in the temperature range 350 to 550 °C. Reaction conditions: 15 kPa  $\text{O}_2$ , 30 kPa  $\text{C}_3\text{H}_8$ ,  $\text{N}_2$  balance, mass space velocity  $4000 \text{ mL} \cdot (\text{h} \cdot \text{g-cat})^{-1}$ , 0.3 g catalyst.

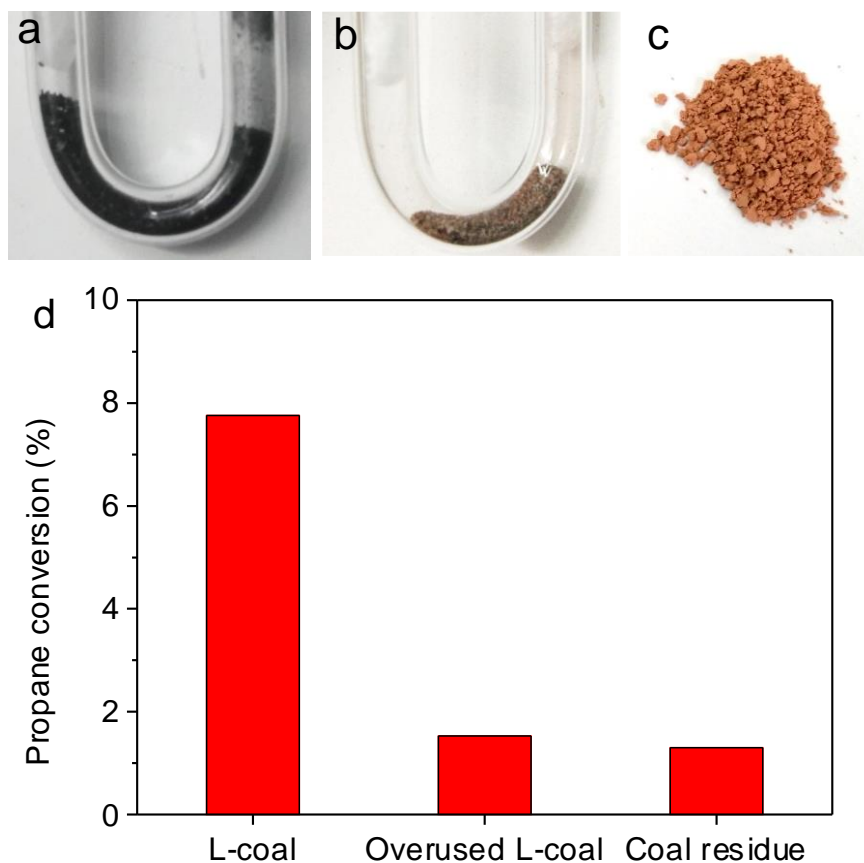

**Figure S5.** Photos of (a) used L-coal, (b) overused L-coal and (c) coal residue. (d) The catalytic activity of L-coal, overused L-coal, and coal residue. Reaction conditions: 15 kPa O<sub>2</sub>, 30 kPa C<sub>3</sub>H<sub>8</sub>, N<sub>2</sub> balance, mass space velocity 4000 mL·(h·g-cat)<sup>-1</sup>. L-coal powder after burning out at 700 °C for 2 h under air atmosphere was marked as coal residue. L-coal powder after reaction under 30 kPa PO<sub>2</sub> was named as overused L-coal powder.

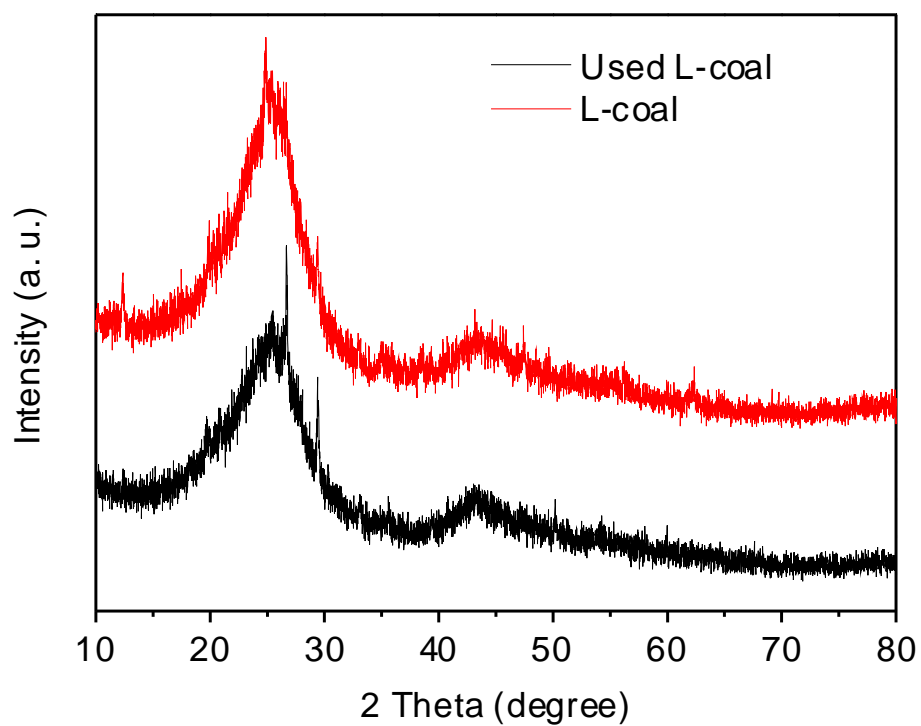

**Figure S6.** XRD patterns of L-coal and used L-coal.

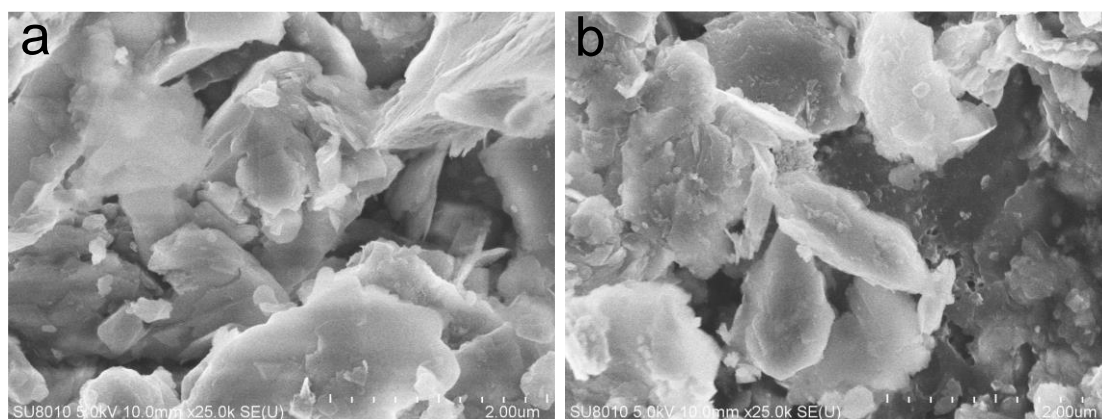

**Figure S7.** SEM images of (a) L-coal powder and (b) used L-coal powder.

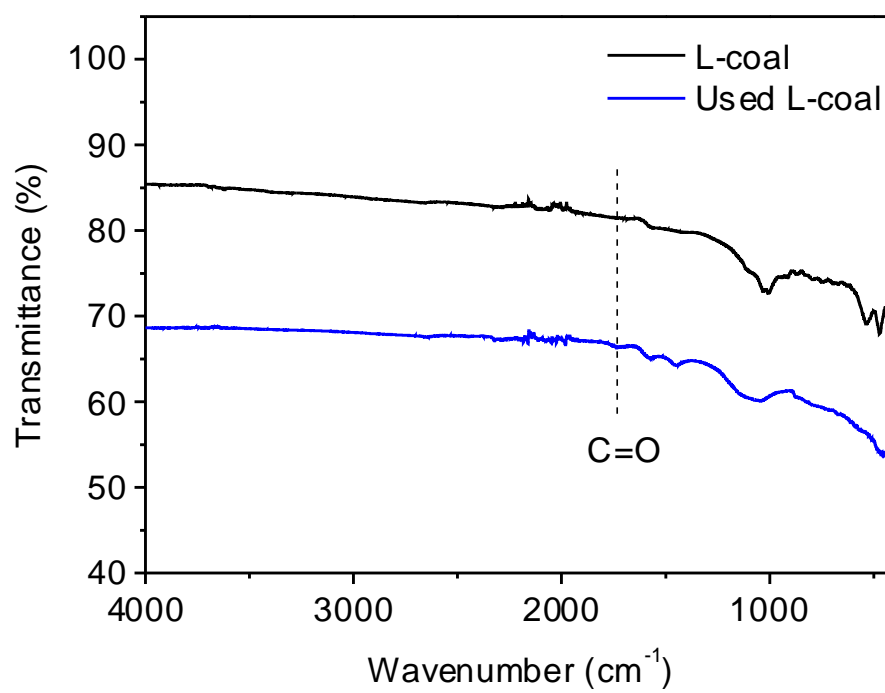

**Figure S8.** IR spectra of L-coal and used L-coal.
